# Supplementary material for: Biological Control of Root-Knot Nematodes by Organic Acid-Producing Lactobacillus brevis WiKim0069 Isolated from Kimchi
Source: PubMed Central journal article supplement — Plant Pathol J. 2019 Dec 12;35(6):662–73. doi: 10.5423/PPJ.OA.08.2019.0225 (PMC6901259; doi:10.5423/ppj.oa.08.2019.0225), 2019-12-12
Supplement: PPJ-35-662_Supple.pdf [file PPJ-35-662_Supple.pdf]

**Supplementary Table 1.** The nematicidal activity of lactic acid bacteria isolated from kimchi against *Meloidogyne incognita*

| Strain | Nematicidal activity | Strain | Nematicidal activity | Strain | Nematicidal activity |
|--------|----------------------|--------|----------------------|--------|----------------------|
| 1      | ***                  | 92     | **                   | 210    | ***                  |
| 2      | -                    | 93     | **                   | 211    | **                   |
| 3      | ***                  | 94     | ***                  | 212    | ***                  |
| 4      | *****                | 95     | ***                  | 213    | ***                  |
| 5      | ***                  | 96-1   | **                   | 214    | ***                  |
| 6      | *                    | 96-2   | ***                  | 215    | **                   |
| 7      | ***                  | 97     | *****                | 216    | ***                  |
| 8      | ***                  | 98     | *****                | 217    | **                   |
| 9      | *                    | 99     | *****                | 218    | **                   |
| 10     | *                    | 100    | ***                  | 219    | ***                  |
| 11     | ***                  | 101    | ***                  | 220    | ***                  |
| 12     | *                    | 102    | ***                  | 221    | **                   |
| 13     | **                   | 103    | ***                  | 222    | ***                  |
| 14     | ****                 | 104    | **                   | 223    | -                    |
| 15     | ****                 | 105    | ***                  | 224    | ***                  |
| 16     | ****                 | 106    | ***                  | 225    | ***                  |
| 17     | ***                  | 107    | ***                  | 226    | ***                  |
| 18     | *****                | 108    | *****                | 227    | **                   |
| 19     | ***                  | 109    | ***                  | 228    | ***                  |
| 20     | ***                  | 110    | ***                  | 229    | ***                  |
| 21     | ***                  | 111    | ***                  | 230    | ***                  |
| 22     | **                   | 112    | ***                  | 231    | ***                  |
| 23     | *                    | 113    | ***                  | 232    | *****                |
| 24     | ***                  | 115    | *****                | 233    | *                    |
| 25     | *                    | 117    | ***                  | 234    | ***                  |
| 26     | *                    | 118    | ***                  | 235    | *****                |
| 27     | ***                  | 120    | **                   | 236    | ***                  |
| 28     | *                    | 122    | **                   | 237    | **                   |
| 29     | ****                 | 123    | ***                  | 239    | ***                  |
| 30     | *                    | 124    | ***                  | 240    | **                   |
| 31     | **                   | 125    | ***                  | 241    | **                   |
| 32     | ***                  | 126    | ***                  | 242    | ***                  |
| 33     | ***                  | 127    | -                    | 243    | ***                  |
| 34     | *                    | 129    | -                    | 244    | ***                  |
| 35     | ***                  | 131    | *                    | 245    | *****                |
| 36     | *                    | 132    | *                    | 246    | *****                |
| 37     | ****                 | 133    | -                    | 247    | **                   |
| 38     | -                    | 134    | -                    | 248    | ***                  |
| 39     | ***                  | 135    | **                   | 249    | *****                |
| 42     | **                   | 136    | **                   | 250    | ***                  |
| 43     | *                    | 137    | **                   | 251    | **                   |
| 44     | *                    | 138    | **                   | 252    | ***                  |

|    |      |       |     |       |       |
|----|------|-------|-----|-------|-------|
| 45 | -    | 139-1 | **  | 253   | ***   |
| 46 | -    | 139-2 | *   | 254   | ***   |
| 47 | ***  | 140-1 | *** | 255   | **    |
| 48 | ***  | 140-2 | *** | 256   | ***   |
| 49 | **   | 141   | **  | 257   | ***   |
| 50 | -    | 142   | **  | 258   | **    |
| 51 | -    | 143   | *   | 259   | **    |
| 52 | *    | 144   | *   | 260   | ****  |
| 54 | **** | 145   | *** | 263   | **    |
| 55 | ***  | 146   | *** | 264   | ***   |
| 56 | *    | 147   | **  | 265   | ***   |
| 57 | *    | 148   | *   | 266   | ***   |
| 58 | -    | 150   | **  | 269   | **    |
| 59 | -    | 151   | *   | 270   | ***   |
| 61 | *    | 153   | **  | 271   | ***   |
| 62 | *    | 155   | *   | 272   | ***   |
| 64 | *    | 156   | *** | 273-1 | ***   |
| 66 | -    | 157   | *   | 273-2 | ***   |
| 67 | **   | 158   | -   | 274   | ***   |
| 68 | **   | 159   | **  | 275   | -     |
| 69 | *    | 161   | *** | 276   | **    |
| 71 | **   | 163   | *** | 277   | **    |
| 72 | **** | 165   | *** | 278   | ***   |
| 73 | *    | 166   | *** | 280   | ***   |
| 78 | -    | 167   | *** | 281   | ***   |
| 79 | **   | 168   | **  | 282   | ***** |
| 81 | ***  | 169   | *** | 283   | ***   |
| 82 | ***  | 170   | **  | 284   | ***   |
| 83 | **   | 171   | *** | 285   | ***   |
| 84 | ***  | 172   | *** | 286   | ***   |
| 85 | ***  | 173   | *** | 287   | ***   |
| 86 | *    | 174   | *   | 288   | **    |
| 87 | ***  | 175-1 | **  | 289   | ***   |
| 88 | ***  | 175-2 | *** | 290   | ***   |
| 89 | ***  | 176   | *** | 291   | ***** |
| 90 | **   | 177   | *** | 292   | ****  |
| 91 | **** | 178   | *** | 293   | ***** |

---

-, No nematode mortality; \*, 20-40% nematode mortality; \*\*, 40-60% nematode mortality; \*\*\*, 60-80% nematode mortality; \*\*\*\*, 80-90% nematode mortality; \*\*\*\*\*, 90-100% nematode mortality.

**Supplementary Table 2.** Nematicidal activity of the initially selected LAB

| Strain          | pH  | Filtrate (%) |       |        |
|-----------------|-----|--------------|-------|--------|
|                 |     | 0.63         | 1.25  | 2.50   |
| 4               | 3.8 | 1.85         | 51.67 | 82.20  |
| 18              | 3.6 | 2.60         | 68.56 | 82.30  |
| 91              | 3.9 | 1.49         | 44.35 | 83.77  |
| 97              | 4.0 | 1.06         | 12.05 | 79.45  |
| 98              | 3.9 | 11.25        | 26.42 | 79.33  |
| 99              | 3.9 | 5.18         | 63.72 | 98.44  |
| 108             | 4.0 | 8.67         | 39.85 | 99.40  |
| 115             | 4.0 | 21.98        | 53.22 | 63.09  |
| 232             | 4.4 | 47.90        | 39.73 | 80.02  |
| 235             | 4.3 | 13.32        | 23.24 | 77.35  |
| 245             | 4.3 | 0.60         | 28.66 | 88.70  |
| 246             | 4.4 | 0.17         | 20.44 | 95.98  |
| 260             | 4.4 | 12.97        | 41.74 | 91.02  |
| 282             | 4.0 | 0.00         | 52.59 | 93.67  |
| 291 (WiKim0069) | 4.2 | 18.68        | 98.03 | 100.00 |
| 293             | 4.3 | 0.00         | 9.76  | 100.00 |

LAB, lactic acid bacteria.
